# Supplementary material for: Gendered knowledge and adaptive practices: Differentiation and change in Mwanga District, Tanzania
Source: Springer Nature journal article supplement (doi:10.1007/s13280-016-0828-z), 2016-11-22
Supplement: MOESM1 [file 15654662]

***Ambio***

Electronic Supplementary Material

*This supplementary material has not been peer reviewed*

**Title: Gendered Local Knowledge and Adaptive Practices: Differentiation and Dynamism in Mwanga District, Tanzania.**

Authors: Thomas A. Smucker and Elizabeth Edna Wangui

The tables below show the perceived effectiveness in reducing climate risk in two villages in Tanzania. Rank 1 is the adaptive practice that is perceived to be most effective. Accessibility was assessed on a five point Likert scale where 1 meant only a few people practiced the activity.

**Table S1** Effectiveness of climate change adaptation practices in Emangulai B sub-village

| Adaptive Practice                                | Effectiveness at reducing climate risk at community level |               | Effectiveness at reducing climate risk in the household |        |
|--------------------------------------------------|-----------------------------------------------------------|---------------|---------------------------------------------------------|--------|
|                                                  | Rank                                                      | Accessibility | Male                                                    | Female |
| Practice irrigated farming                       | 1                                                         | 3             | 1.3                                                     | 1.6    |
| Rely on a combination of herding and farming     | 1                                                         | 3             | 1.6                                                     | 1.9    |
| Combine traditional and improved breeds          | 2                                                         | 1             | 2.3                                                     | 1.7    |
| Educate children                                 | 3                                                         | 5             | 2.8                                                     | 3.1    |
| Treat livestock with modern veterinary medicines | 4                                                         | 5             | 4.1                                                     | 3.5    |
| Engage in livestock and other                    | 5                                                         | 3             | 0.8                                                     | 0.2    |

trade

Engage in temporary

5 3 0.4 1.1

employment

Move livestock

6 5 3.4 2.5

Buy fodder

6 5 2.7 3.8

---

**Table S2** Effectiveness of climate change adaptation practices in Mangio village

| Adaptive Practice                        | Effectiveness at                         |               |                                                         |        |      |
|------------------------------------------|------------------------------------------|---------------|---------------------------------------------------------|--------|------|
|                                          | reducing climate risk at community level |               | Effectiveness at reducing climate risk in the household |        |      |
|                                          | Rank                                     | Accessibility | Male                                                    | Female | Both |
| Education                                | 1                                        | 4             | 4.4                                                     | 4.0    | 3.2  |
| Using fast growing seed varieties        | 2                                        | 4             | 3.1                                                     | 2.2    | 2.8  |
| Early planting                           | 2                                        | 4             | 3.1                                                     | 3.1    | 2.6  |
| Applying animal manure                   | 2                                        | 4             | 4.6                                                     | 2.8    | 4.1  |
| Farming root crops                       | 3                                        | 2             | 3.4                                                     | 3.5    | 3.6  |
| Using improved livestock breeds          | 4                                        | 4             | 3.9                                                     | 3.5    | 3.5  |
| Less forest fires                        | 5                                        | 4             | 4.5                                                     | 5.0    | 4.7  |
| Planting trees                           | 5                                        | 4             | 2.6                                                     | 3.7    | 4.2  |
| Terracing                                | 5                                        | 4             | 0.6                                                     | 0.0    | 0.7  |
| Participating in village community banks | 6                                        | 2             | 2.4                                                     | 2.5    | 2.3  |
